# Supplementary material for: BMP4 Exerts Anti-Neurogenic Effect via Inducing Id3 during Aging
Source: MDPI journal article supplement (doi:10.3390/biomedicines10051147), 2022-05-17
Supplement: s1 [file s1]

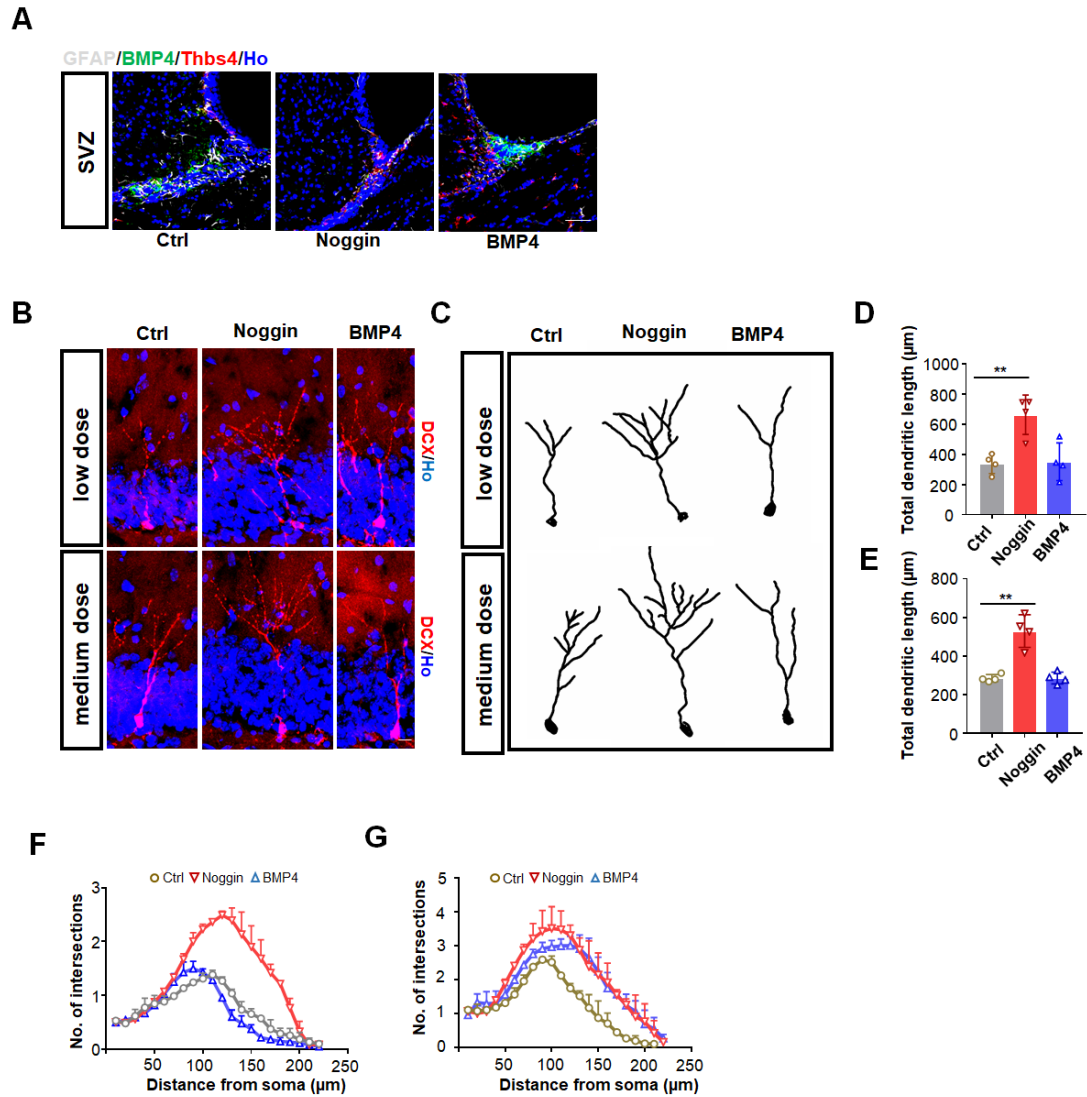

**Supplemental Figure S1. Noggin promotes neurogenic differentiation in the SGZ.** (A) Representative images of GFAP, Thbs4 and BMP4 staining in the SVZ of 8 MO female mice one week after saline, noggin or BMP4 infusion. Scale bar, 50 μm. (B) Representative images of the morphology of DCX-positive immature neurons in the SGZ of 8 MO female mice one week after saline, a low (top panel) and a medium (bottom panel) dose of noggin or BMP4 infusion. Scale bar, 10 μm. (C) Image tracing of DCX positive immature neurons in the SGZ of 8 MO female mice one week after saline, a low (top panel) and a medium (bottom panel) dose of noggin or BMP4 infusion. Scale bar, 10 μm. (D, E) Quantification of the total dendritic length of DCX positive immature neurons in the SGZ of 8 MO mice one week after saline, a low (D) and a medium (E) dose of noggin or BMP4 infusion. n = 20-25 neurons from 4 mice. \*\* $p < 0.01$  (F, G) Quantification of dendritic complexity of DCX-positive immature neurons in the SGZ of 8 MO mice one week after saline, a low (F) and a medium (G) dose of noggin or BMP4 infusion. n = 20-25 neurons from 4 mice.

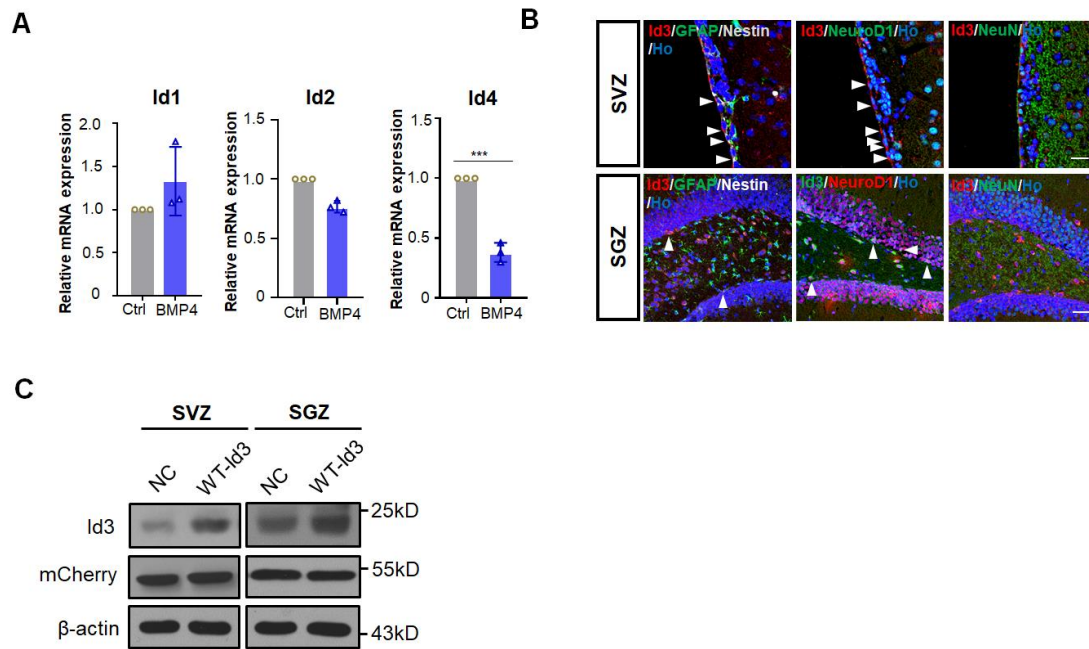

**Supplemental Figure S2.** In vitro and in vivo characterization of Id-NeuroD1 expression. **(A)** Transcription levels of Id1, Id2 and Id4 in ctrl and BMP4 treated C17.2 mouse stem cells analyzed by qPCR.  $n = 3$ .  $***p < 0.001$  **(B)** Characterization of Id3 positive cells in the SVZ (top panel) and SGZ (bottom panel) of 14 MO female mice. White arrowheads in the top panels indicate Nestin<sup>+</sup>Id3<sup>+</sup>GFAP<sup>+</sup> NSCs and Id3<sup>+</sup>NeuroD1<sup>+</sup> TAPs of SVZ. White arrowheads in the bottom panels indicate Nestin<sup>+</sup>Id3<sup>+</sup>GFAP<sup>+</sup> NSCs and Id3<sup>+</sup>NeuroD1<sup>+</sup> IPCs of SGZ. Scale bar, 50  $\mu$ m. **(C)** Western blot analyses of proteins extracted from the SVZ and SGZ of three mice grafted with lentivirus expressing negative control (NC) and wild type Id3 (Id3-WT).  $\beta$ -actin is used as a loading control.
